# Supplementary material for: Viscoelastic hydrogels from poly(vinyl alcohol)–Fe(iii) complex
Source: Royal Society of Chemistry journal article supplement (doi:10.1039/c3bm00167a), 2013-01-01

## Viscoelastic Hydrogels from Poly (vinyl alcohol)/Fe (III) Complex

Narahari Mahanta, Yiwei Teow, Suresh Valiyaveetil\*

*Department of Chemistry, National University of Singapore,  
3 Science Drive 3, Singapore 117543.  
E-mail: [chmsv@nus.edu.sg](mailto:chmsv@nus.edu.sg)*

**S.I-1** Camera images of PVA solution and the hydrogel.

**S.I-2** Attenuated total reflectance-Infrared spectra of lyophilized sample of (a) PVA and (b) Fe<sup>3+</sup> crosslinked PVA.

**S.I-3** Swelling analysis of hydrogels in presence of common electrolytes such as CaCl<sub>2</sub>, NaCl, KCl at different concentrations and observed after 5 days incubation at 37 °C.

**S.I-4** Scanning electron micrographs of freeze dried lyophilised sample of PVFeGel-4 (A) and optical microscopic image of water swollen hydrogel of PVFeGel-4 (B).

**S.I-1** Camera images of PVA solution and the hydrogel

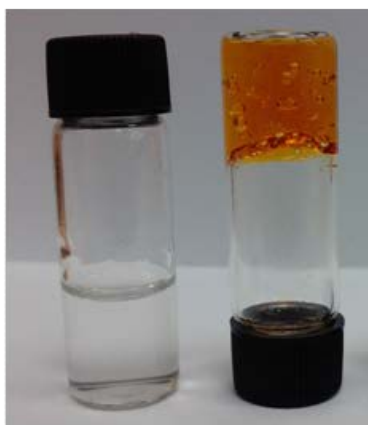

**S.I-2** Attenuated total reflectance-Infrared spectra of lyophilized sample of (a) PVA and (b)  $\text{Fe}^{3+}$  crosslinked PVA

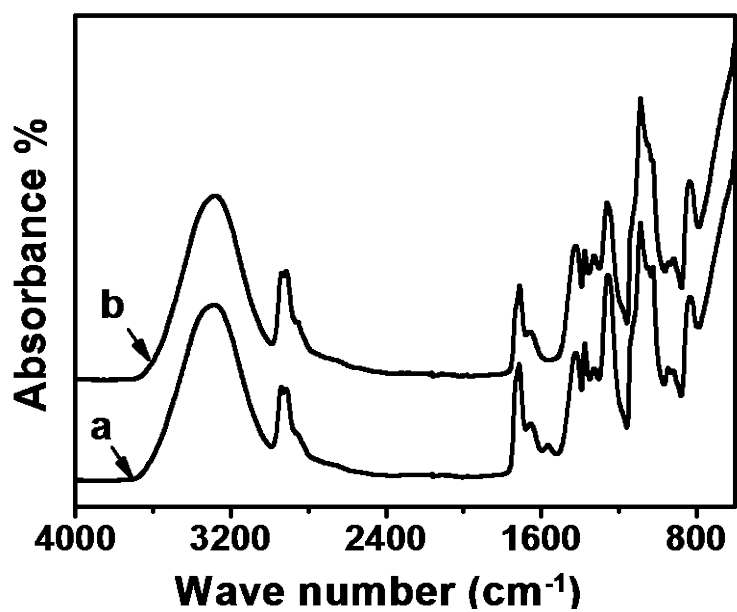

**S.I-3** Swelling analysis of hydrogels in presence of common electrolytes such as  $\text{CaCl}_2$ ,  $\text{NaCl}$ ,  $\text{KCl}$  at different concentrations and observed after 5 days incubation at  $37^\circ\text{C}$ .

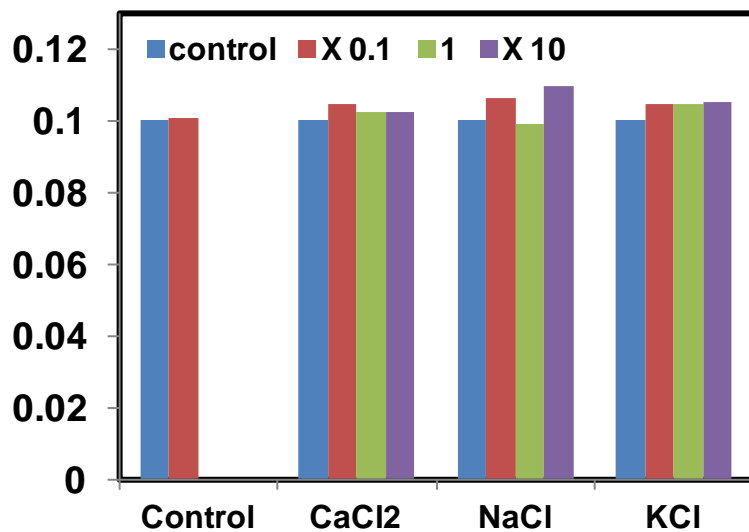

**S.I-4** Scanning electron micrographs of freeze dried lyophilised sample of PVFeGel-4 (A) and optical microscopic image of water swollen hydrogel of PVFeGel-4 (B).

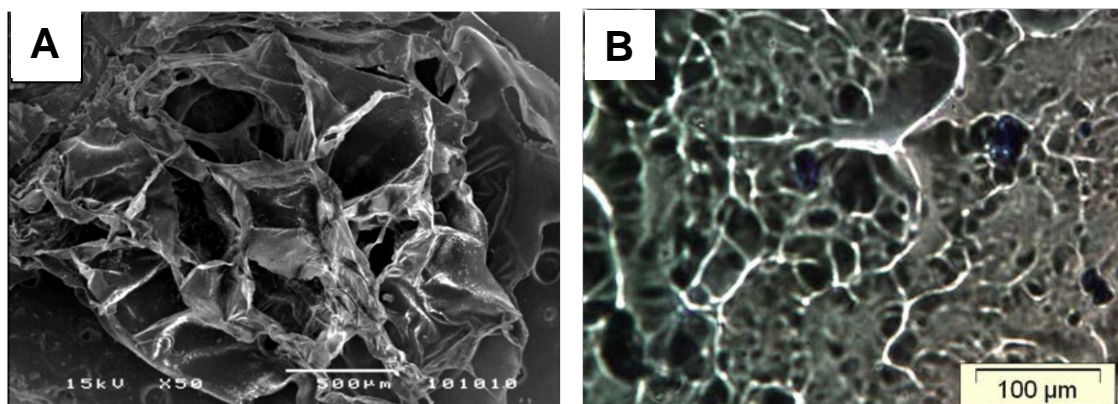

Supplement: c3bm00167a.pdf [file c3bm00167a.pdf]
